# Supplementary material
Source: PubMed Central journal article supplement (PMC3510358)

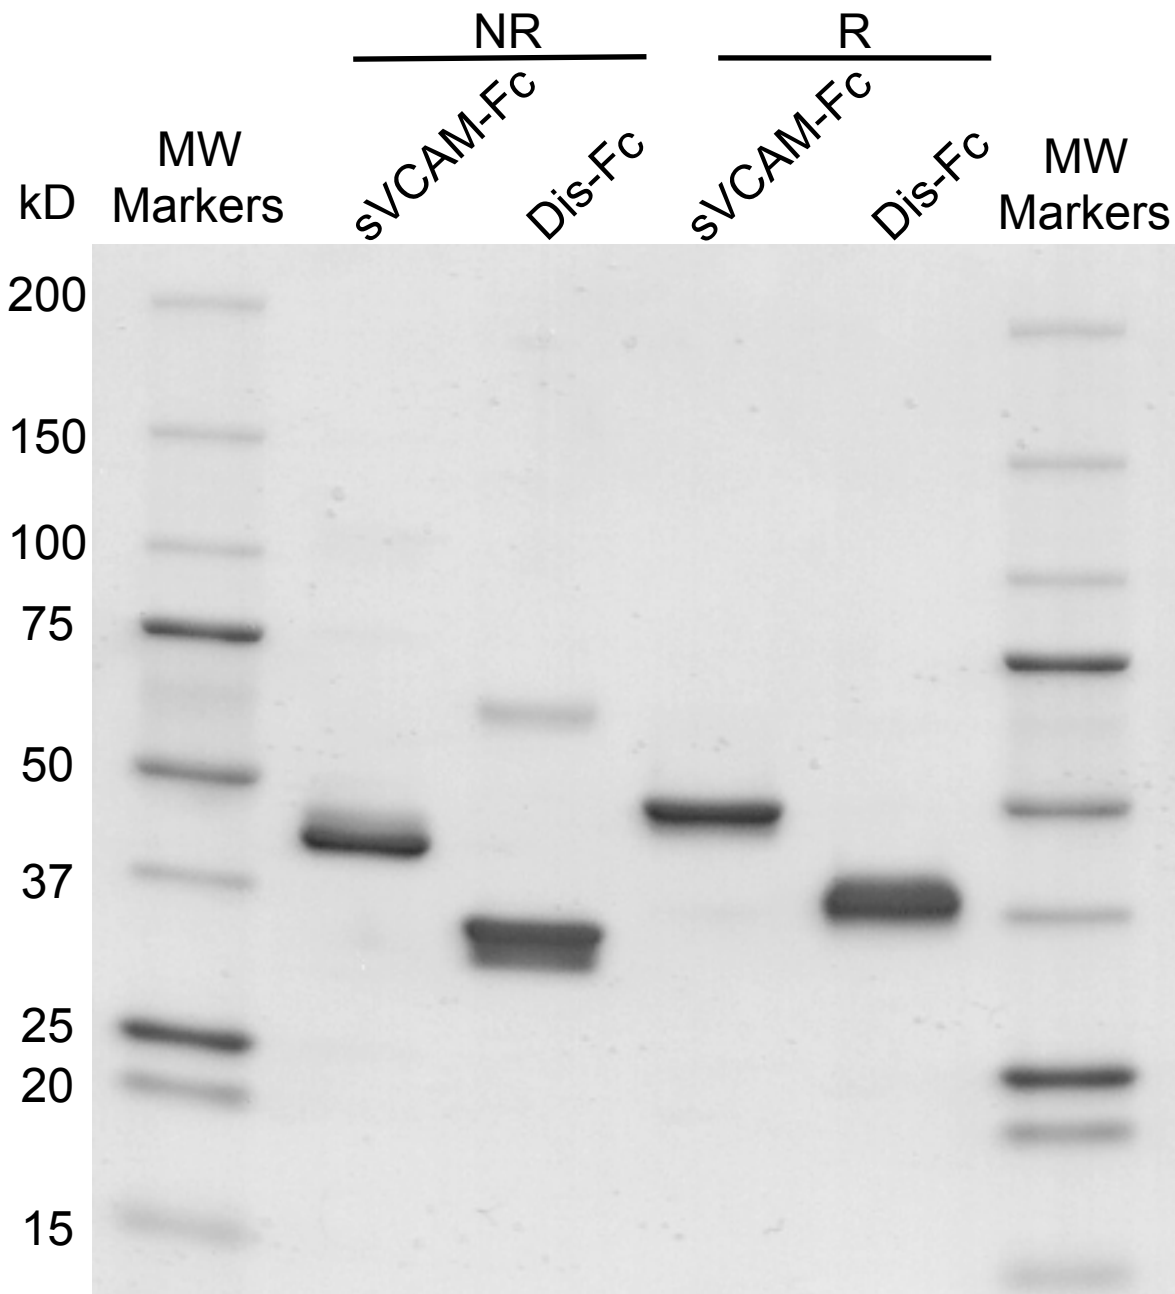

Supplement: NIHMS384364-supplement-01.pdf [file NIHMS384364-supplement-01.pdf]
